# Supplementary material for: Neuronal Activity-Dependent Activation of Astroglial Calcineurin in Mouse Primary Hippocampal Cultures
Source: MDPI journal article supplement (doi:10.3390/ijms19102997), 2018-09-30
Supplement: s1 [file s1]

## Neuronal activity-dependent activation of astroglial calcineurin in mouse primary hippocampal cultures

Dmitry Lim, Lisa Mapelli, Pier Luigi Canonico, Francesco Moccia and Armando A Genazzani

| Supplementary material | Title                                                                                                                                  | File          |
|------------------------|----------------------------------------------------------------------------------------------------------------------------------------|---------------|
| Supplementary video 1  | Ionomycin-induced nuclear translocation of NY calcineurin sensor                                                                       | Suppl_Video_1 |
| Supplementary Figure 1 | Examples of neuronal and astroglial Ca <sup>2+</sup> signals induced by cLTP induction protocol                                        | Suppl_Figures |
| Supplementary Figure 2 | Neuronal Ca <sup>2+</sup> transients registered during stimulation of mixed neuron-astroglial hippocampal cultures with cLTP protocol. | Suppl_Figures |

**A**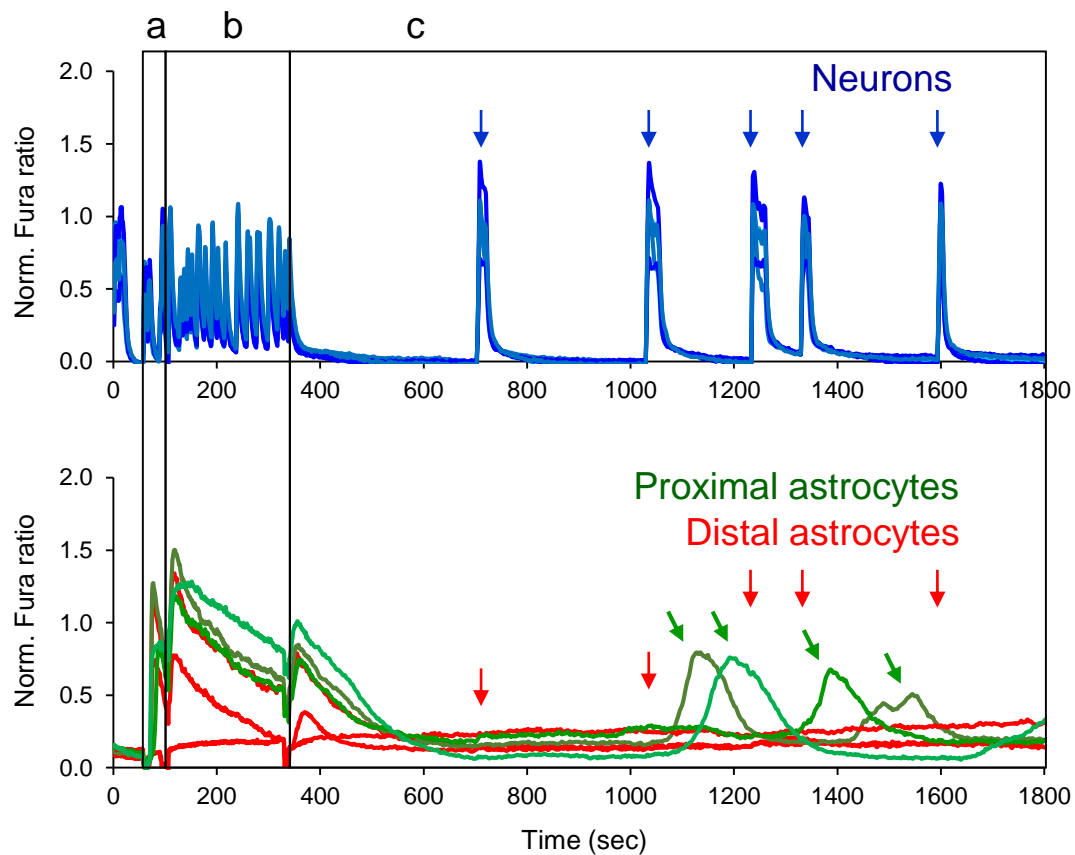**B**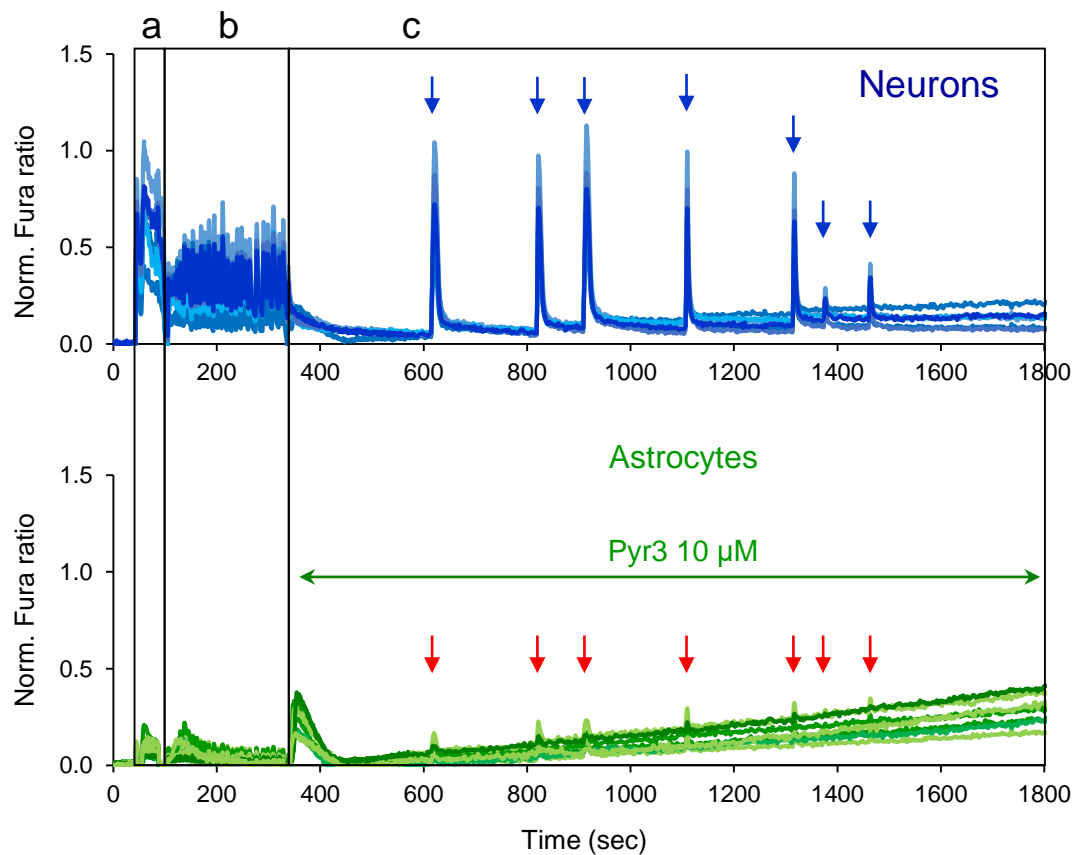

**Supplementary Figure 1.** Representative Fura-2  $\text{Ca}^{2+}$  imaging experiments demonstrating cLTP-induced  $\text{Ca}^{2+}$  transient in neurons (blue traces) and astrocytes (in juxtaposition to neurons, green traces, or distal astrocytes, red traces). In black frame, the sector (a) indicates  $\text{Mg}^{2+}$  washout; sector (b), cLTP induction phase; and sector (c), cLTP development phase. During the cLTP development phase, blue arrows indicate  $\text{Ca}^{2+}$  spikes in neurons, green arrows – delayed cLTP-induced  $\text{Ca}^{2+}$  transients in astrocytes, and red arrows – artifacts due to light interference with neuronal  $\text{Ca}^{2+}$  spikes. A, control induction of cLTP; B, inhibition of cLTP-induced delayed astroglial  $\text{Ca}^{2+}$  transients with SOCE inhibitor Pyr3

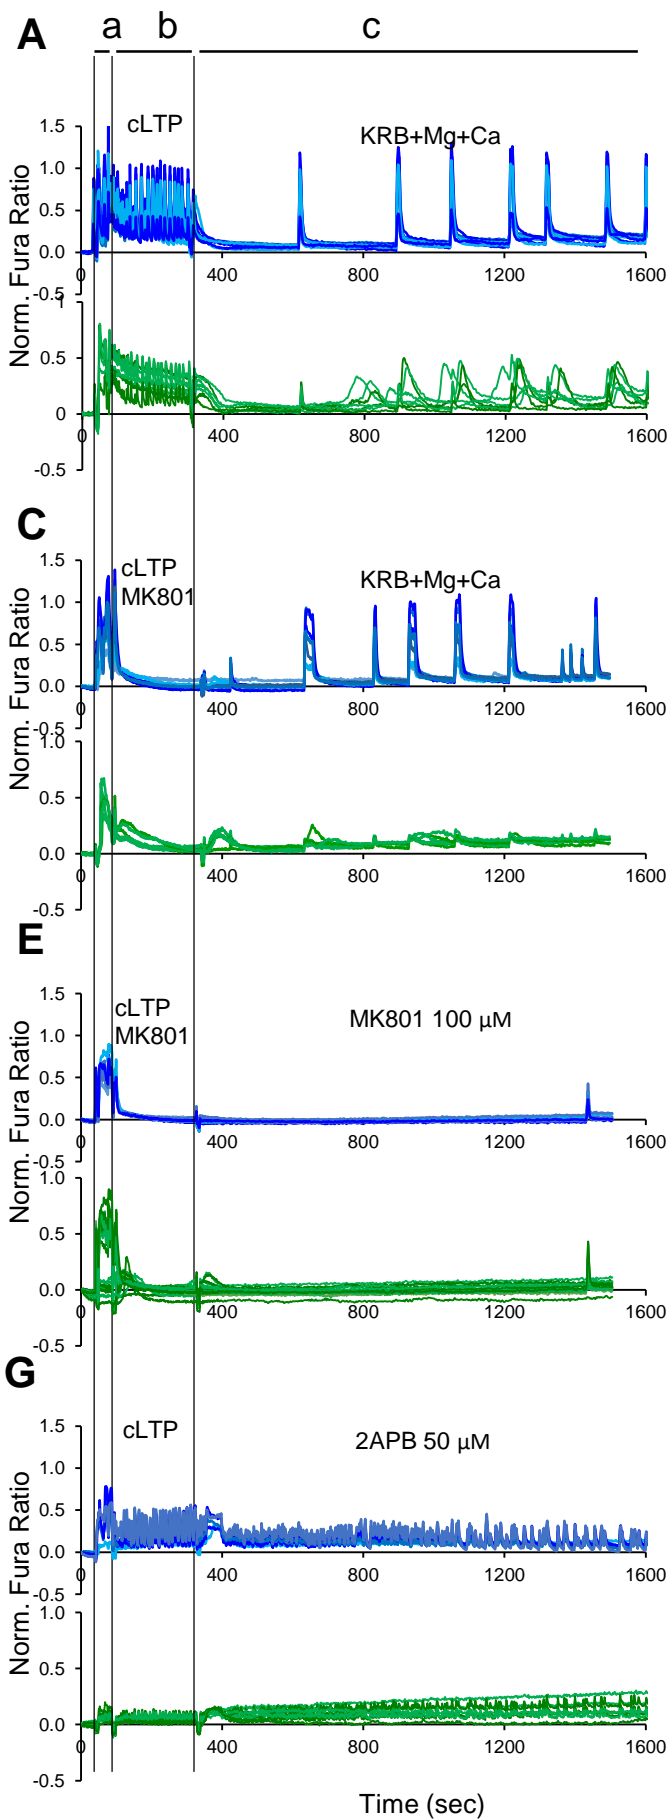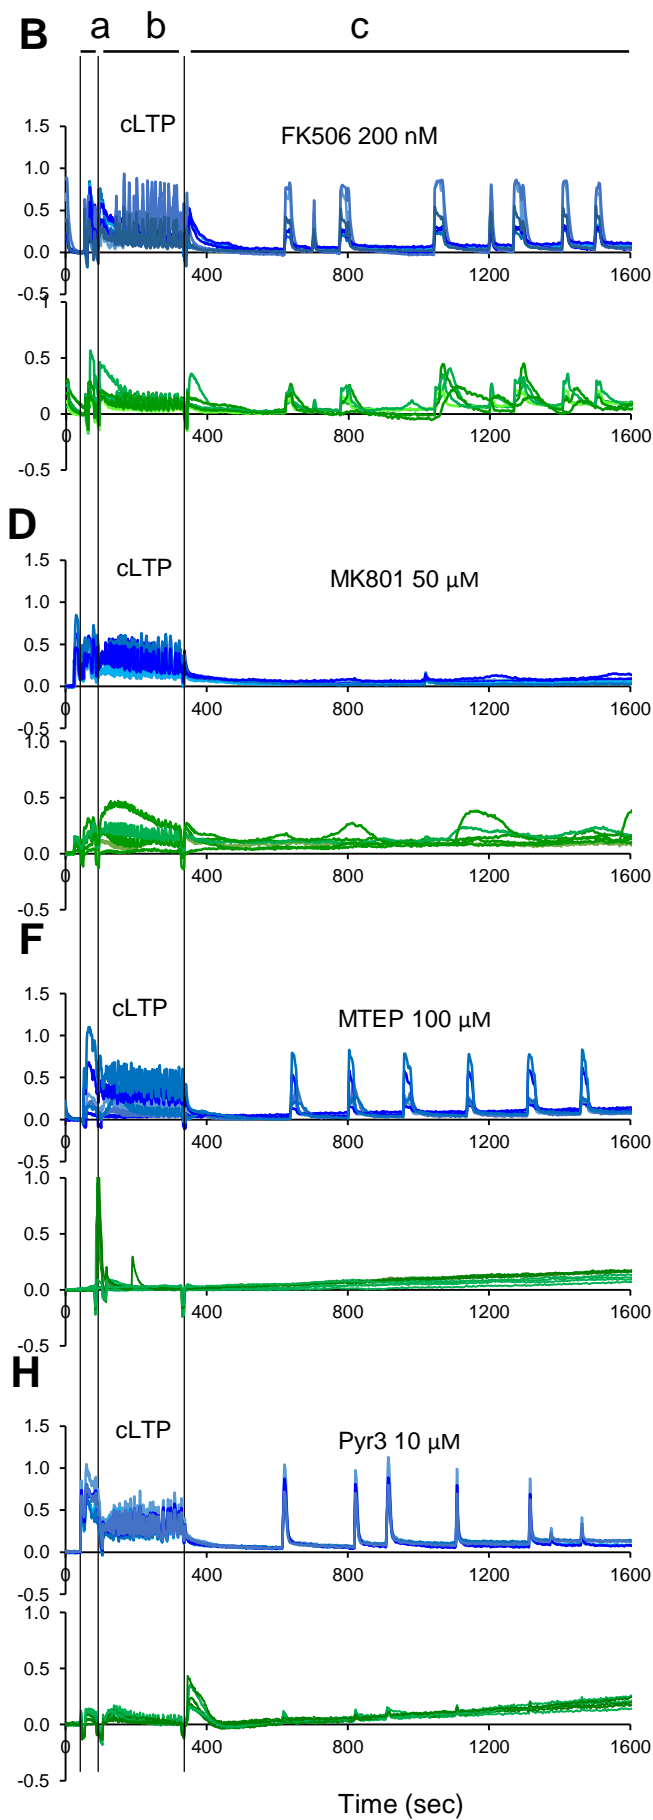

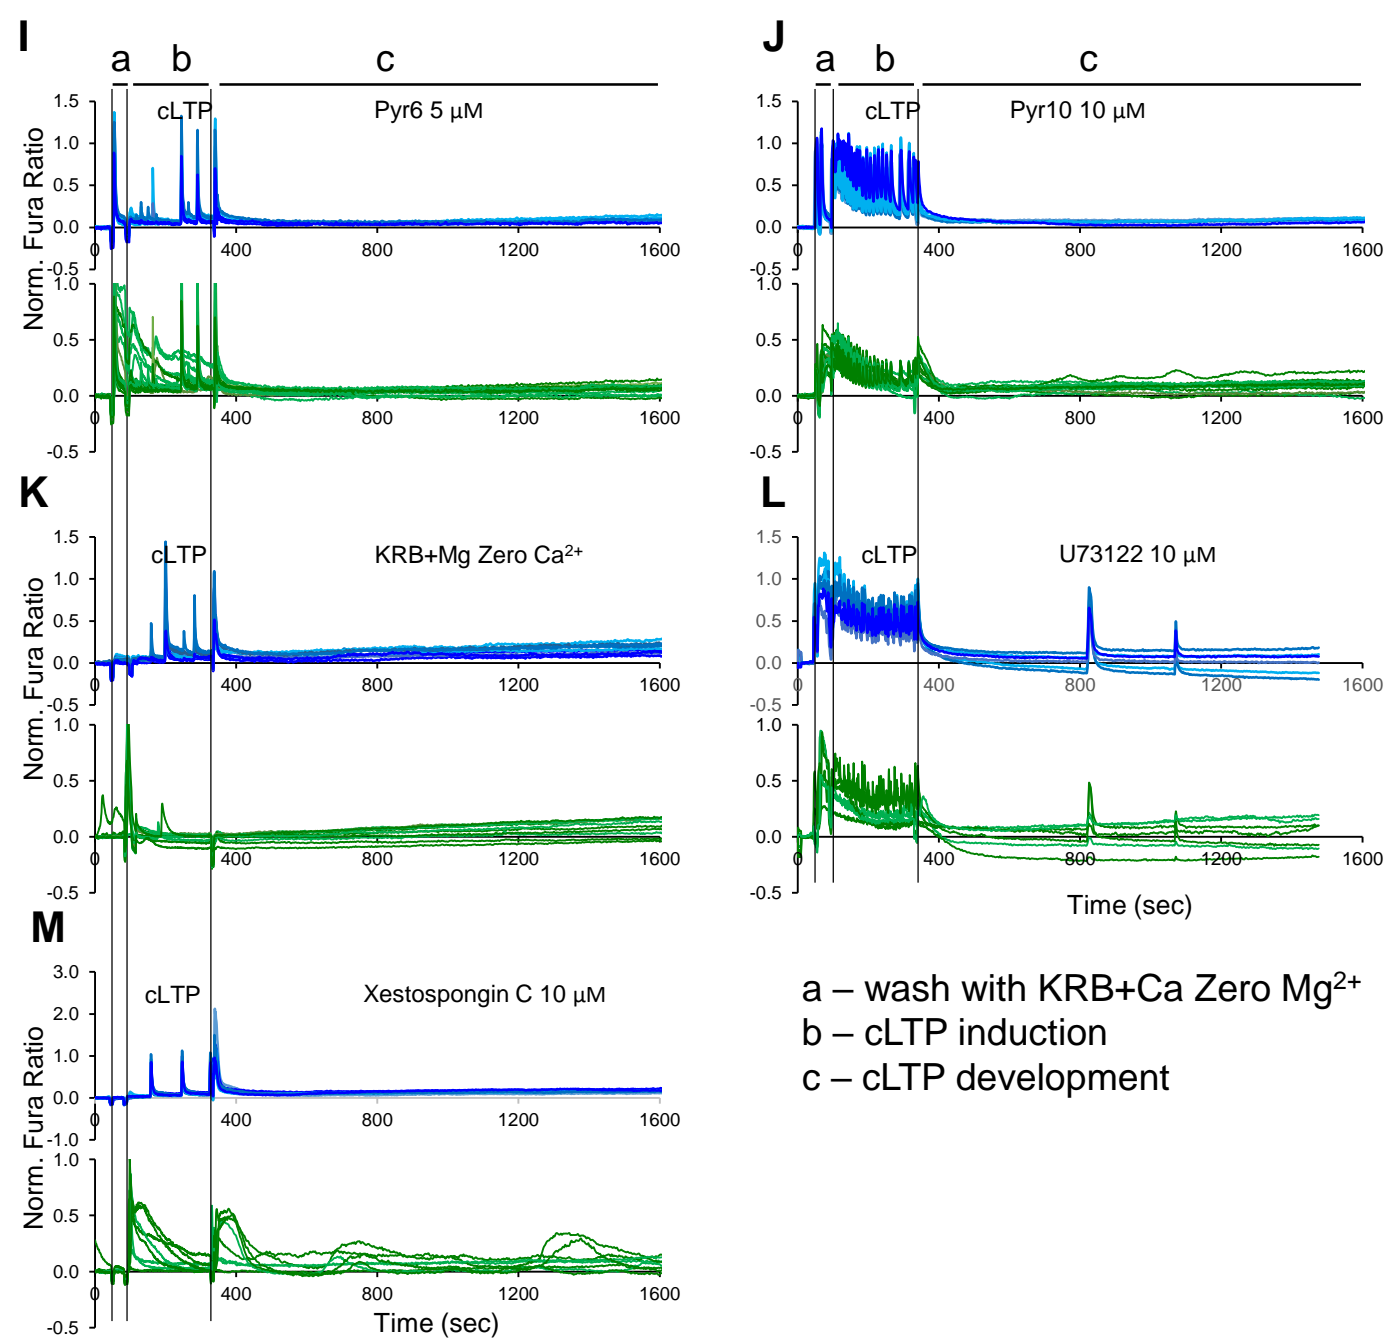

**Supplementary Figure 2.** Neuronal (blue) and astroglial (green)  $\text{Ca}^{2+}$  transients registered during stimulation of mixed neuron-astroglial hippocampal cultures with cLTP protocol. Panel labels correspond to panels in Figure 5 described in the main text. Sector (a) indicates  $\text{Mg}^{2+}$  washout with KRB+Ca Zero  $\text{Mg}^{2+}$ ; sector (b), cLTP induction phase; and sector (c), cLTP development phase. In the sector (b), cLTP indicates the cLTP induction phase.
